# Supplementary material
Source: publisher site journal article supplement (https://www.dovepress.com/get_supplementary_file.php?f=236011.docx)
Supplement: Supplementary file 1 [file get_supplementary_file.php]

**Appendix**

**Appendix 1: The item pool**

**Negative Life Events for Graduates**

**LES-GS Ⅰ**

| **Life event** | **Occurrence**  (during the past year) | | | **Mental pressure** | | | | |
| --- | --- | --- | --- | --- | --- | --- | --- | --- |
|  | Not occurred | occur | times | 0 | 1 | 2 | 3 | 4 |
| 1. Failure of the course exam |  |  |  |  |  |  |  |  |
| 2. Rejection of submitted paper |  |  |  |  |  |  |  |  |
| 3. Severely criticized by the mentor |  |  |  |  |  |  |  |  |
| 4. Dispute with the mentor |  |  |  |  |  |  |  |  |
| 5. Controversy over the order of authorship of a paper |  |  |  |  |  |  |  |  |
| 6. Fail to receive an award |  |  |  |  |  |  |  |  |
| 7. Graduation thesis failed to pass peer review |  |  |  |  |  |  |  |  |
| 8. On business |  |  |  |  |  |  |  |  |
| 9. Travel abroad |  |  |  |  |  |  |  |  |
| 10.Failure to secure a job |  |  |  |  |  |  |  |  |
| 11.Breakdown of affectionate relationship |  |  |  |  |  |  |  |  |
| 12. Divorce |  |  |  |  |  |  |  |  |
| 13.One’s own or spouse’s accidental pregnancy |  |  |  |  |  |  |  |  |
| 14. Serious illness of relatives |  |  |  |  |  |  |  |  |
| 15. Death of a close family member |  |  |  |  |  |  |  |  |
| 16. Loan/debt |  |  |  |  |  |  |  |  |
| 17. Encounter economic fraud in reality/internet |  |  |  |  |  |  |  |  |
| 18. Fined by the school administration |  |  |  |  |  |  |  |  |
| 19. Victim of theft |  |  |  |  |  |  |  |  |
| 20. Family suffered great economic losses |  |  |  |  |  |  |  |  |
| 21. Discrimination |  |  |  |  |  |  |  |  |
| 22. Short-term illness (e.g. cold, diarrhea) |  |  |  |  |  |  |  |  |
| 23. Accidental fright |  |  |  |  |  |  |  |  |
| 24. Quarrel with another |  |  |  |  |  |  |  |  |
| 25. Losing face or reputation in public |  |  |  |  |  |  |  |  |
| 26. Friendship breakdown |  |  |  |  |  |  |  |  |
| 27. Other negative life event |  |  |  |  |  |  |  |  |
| 28. Other negative life event |  |  |  |  |  |  |  |  |
| 29. Other negative life event |  |  |  |  |  |  |  |  |

**LES-GS Ⅱ**

| **Life event** | **Occurrence**  (during the past year) | | **Mental Pressure** | | | | |
| --- | --- | --- | --- | --- | --- | --- | --- |
|  | Not occurred | Occurred | 0 | 1 | 2 | 3 | 4  重 |
| 1. Not interested in the major |  |  |  |  |  |  |  |
| 1. Difficult mentorship relationship |  |  |  |  |  |  |  |
| 1. The graduation project is not going well |  |  |  |  |  |  |  |
| 1. The publication of academic papers fails to meet the graduation requirements |  |  |  |  |  |  |  |
| 1. Tense relationship with scientific research team members |  |  |  |  |  |  |  |
| 1. Graduation postponed |  |  |  |  |  |  |  |
| 1. Difficulty in finding a job |  |  |  |  |  |  |  |
| 1. Bad relationship with partner or spouse |  |  |  |  |  |  |  |
| 1. Long-distance relationship between couples/lovers |  |  |  |  |  |  |  |
| 1. Living far away from family |  |  |  |  |  |  |  |
| 1. Tension with family members |  |  |  |  |  |  |  |
| 1. Long-term financial stress |  |  |  |  |  |  |  |
| 1. Chronic disease |  |  |  |  |  |  |  |
| 1. Significant weight gain |  |  |  |  |  |  |  |
| 1. Other negative life event |  |  |  |  |  |  |  |
| 1. Other negative life event |  |  |  |  |  |  |  |
| 1. Other negative life event |  |  |  |  |  |  |  |

**Appendix 2: The final scale**

**Negative Life Events for Graduates**

This scale assesses daily life events that graduate students may encounter. These events may have a mental impact on the individual as they could be considered stressful, or distressing. However, the degree of mental pressure caused by each event is not identical. The scale is composed of two sub-scales. The first sub-scale assesses short-term life-events, which could be counted by the number of experiences. The second sub-scale assesses long-term life events. Please answer the following questions according to your own situation. Please read the notes below.

(1) These events occurred during the past year.

(2) For the first sub-scale, if the event has not occurred, please mark "√" in the column “not occurred”. If the event has occurred, please mark the number of times that it has occurred, and choose the degree of its mental pressure by placing a tick "√" where relevant.

(3) The items contained in the second sub-scale assess long-term continuous events. These do not need to be counted as per the short-term events, but may be marked with "√" according to the appropriate options.

(4) Measure of mental pressure:

0- no mental pressure

1- slight mental pressure

2- moderate mental pressure

3- severe mental pressure

4- extremely severe mental pressure

**LES-GS Ⅰ**

| **Life event** | **Occurrence**  (during the past year) | | | **Mental pressure** | | | | |
| --- | --- | --- | --- | --- | --- | --- | --- | --- |
|  | Not occurred | occur | times | 0 | 1 | 2 | 3 | 4 |
| 1. Rejection of submitted paper |  |  |  |  |  |  |  |  |
| 2. Severely criticized by the mentor |  |  |  |  |  |  |  |  |
| 3. Dispute with the mentor |  |  |  |  |  |  |  |  |
| 4. Fail to receive an award |  |  |  |  |  |  |  |  |
| 5. Death of a close family member |  |  |  |  |  |  |  |  |
| 6. Fined by the school administration |  |  |  |  |  |  |  |  |
| 7. Other negative life event |  |  |  |  |  |  |  |  |
| 8. Other negative life event |  |  |  |  |  |  |  |  |
| 9. Other negative life event |  |  |  |  |  |  |  |  |

**LES-GS Ⅱ**

| **Life event** | **Occurrence**  (during the past year) | | **Mental Pressure** | | | | |
| --- | --- | --- | --- | --- | --- | --- | --- |
|  | Not occurred | Occurred | 0 | 1 | 2 | 3 | 4  重 |
| 1. Not interested in the major |  |  |  |  |  |  |  |
| 1. Difficult mentorship relationship |  |  |  |  |  |  |  |
| 1. The graduation project is not going well |  |  |  |  |  |  |  |
| 1. The publication of academic papers fails to meet the graduation requirements |  |  |  |  |  |  |  |
| 1. Difficulty in finding a job |  |  |  |  |  |  |  |
| 1. Bad relationship with partner or spouse |  |  |  |  |  |  |  |
| 1. Tension with family members |  |  |  |  |  |  |  |
| 1. Long-term financial stress |  |  |  |  |  |  |  |
| 1. Other negative life event |  |  |  |  |  |  |  |
| 1. Other negative life event |  |  |  |  |  |  |  |
| 1. Other negative life event |  |  |  |  |  |  |  |
